# Supplementary material
Source: PubMed Central journal article supplement (PMC5520540)

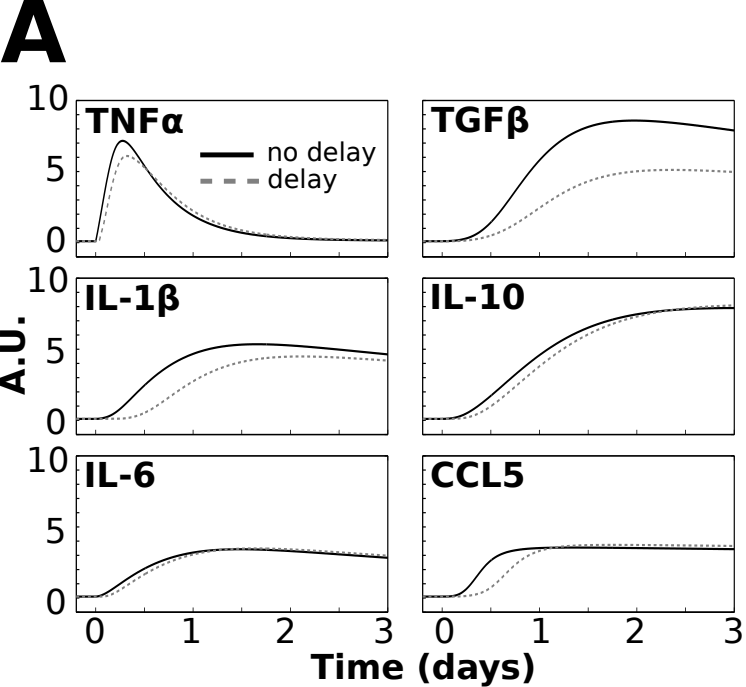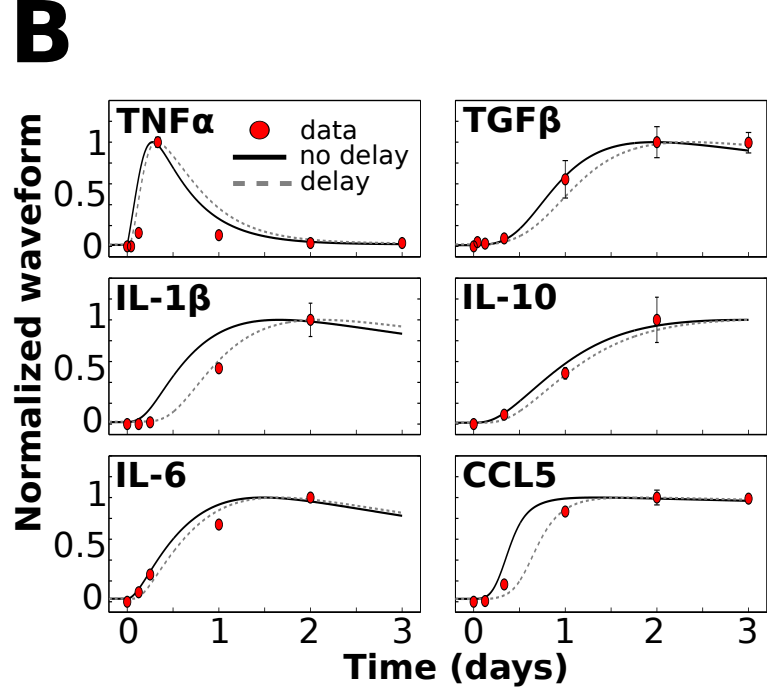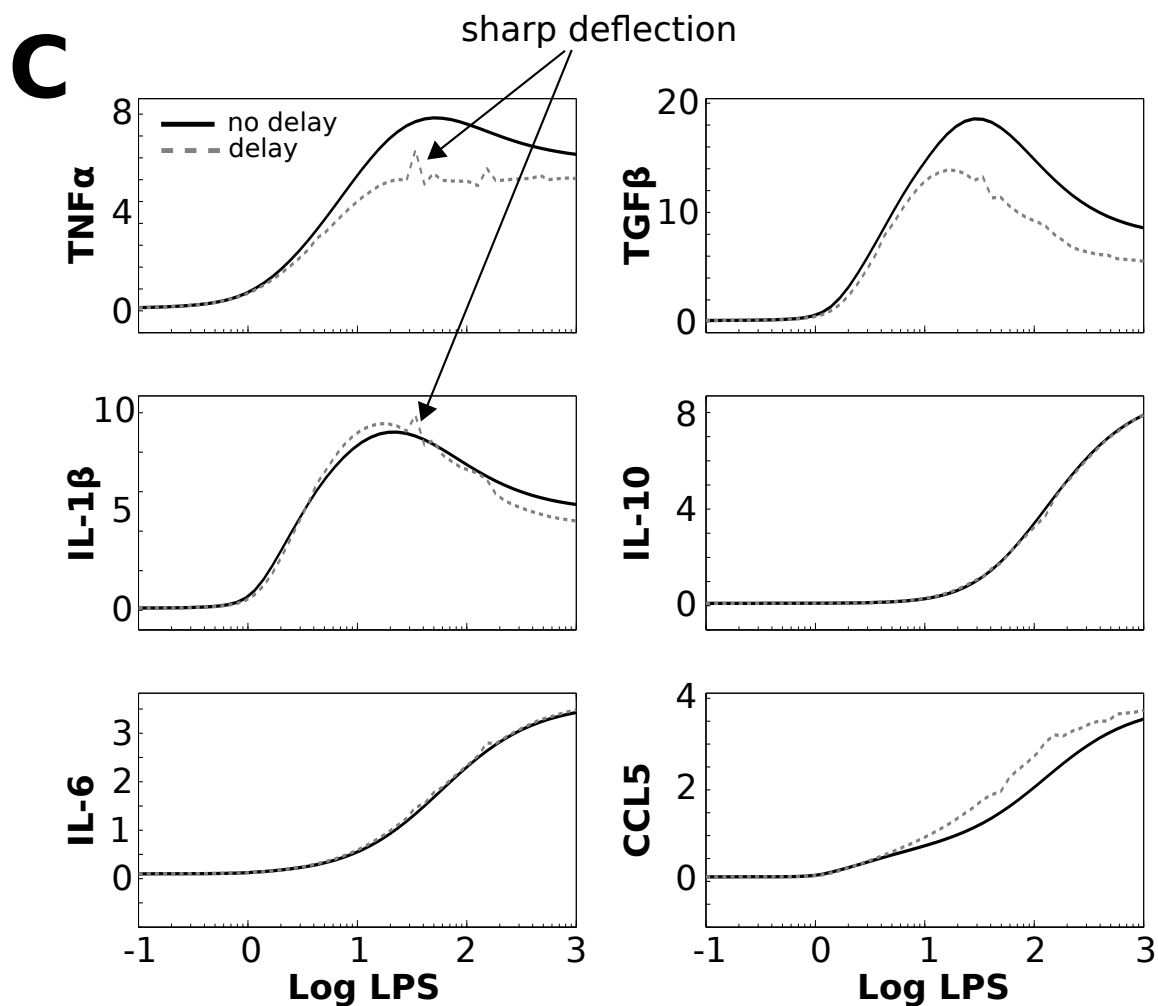

Supplement: NIHMS878946-supplement-Figure_S1.pdf [file NIHMS878946-supplement-Figure_S1.pdf]

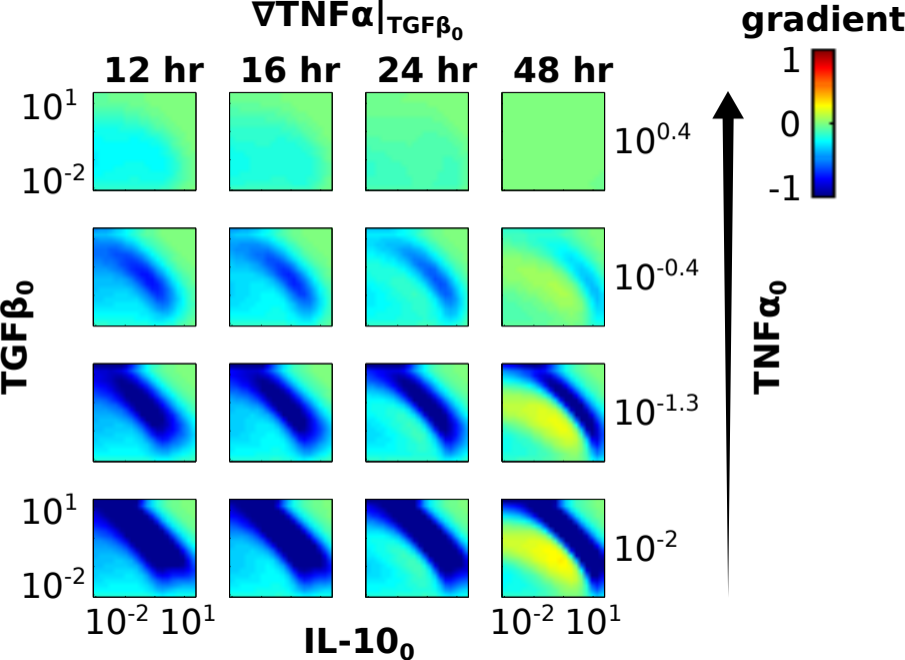

Supplement: NIHMS878946-supplement-Figure_S7.pdf [file NIHMS878946-supplement-Figure_S7.pdf]
